# Supplementary material for: Genetic Diversity, Evolutionary Dynamics, and Ongoing Spread of Pedilanthus Leaf Curl Virus
Source: MDPI journal article supplement (doi:10.3390/v15122358), 2023-11-30
Supplement: s1 [file s1]

## Supplementary data

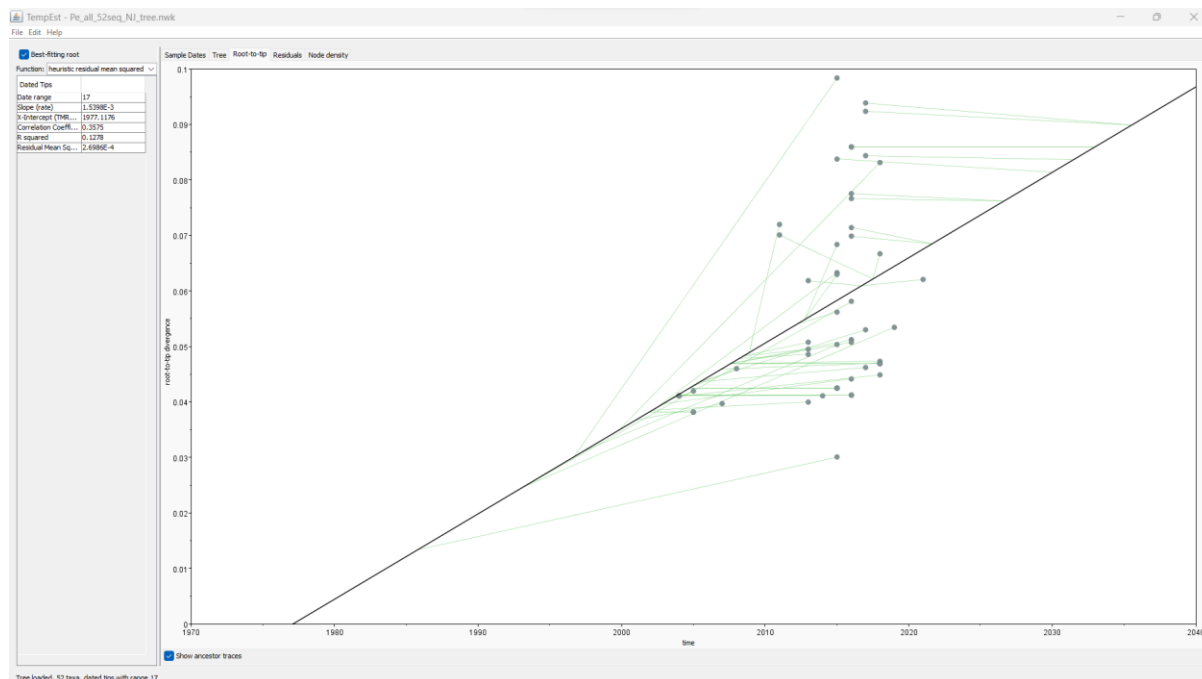

**Figure S1.** TempEST analysis of PeLCV-all to assess potential evolutionary time of the most recent common ancestor (MRCA)

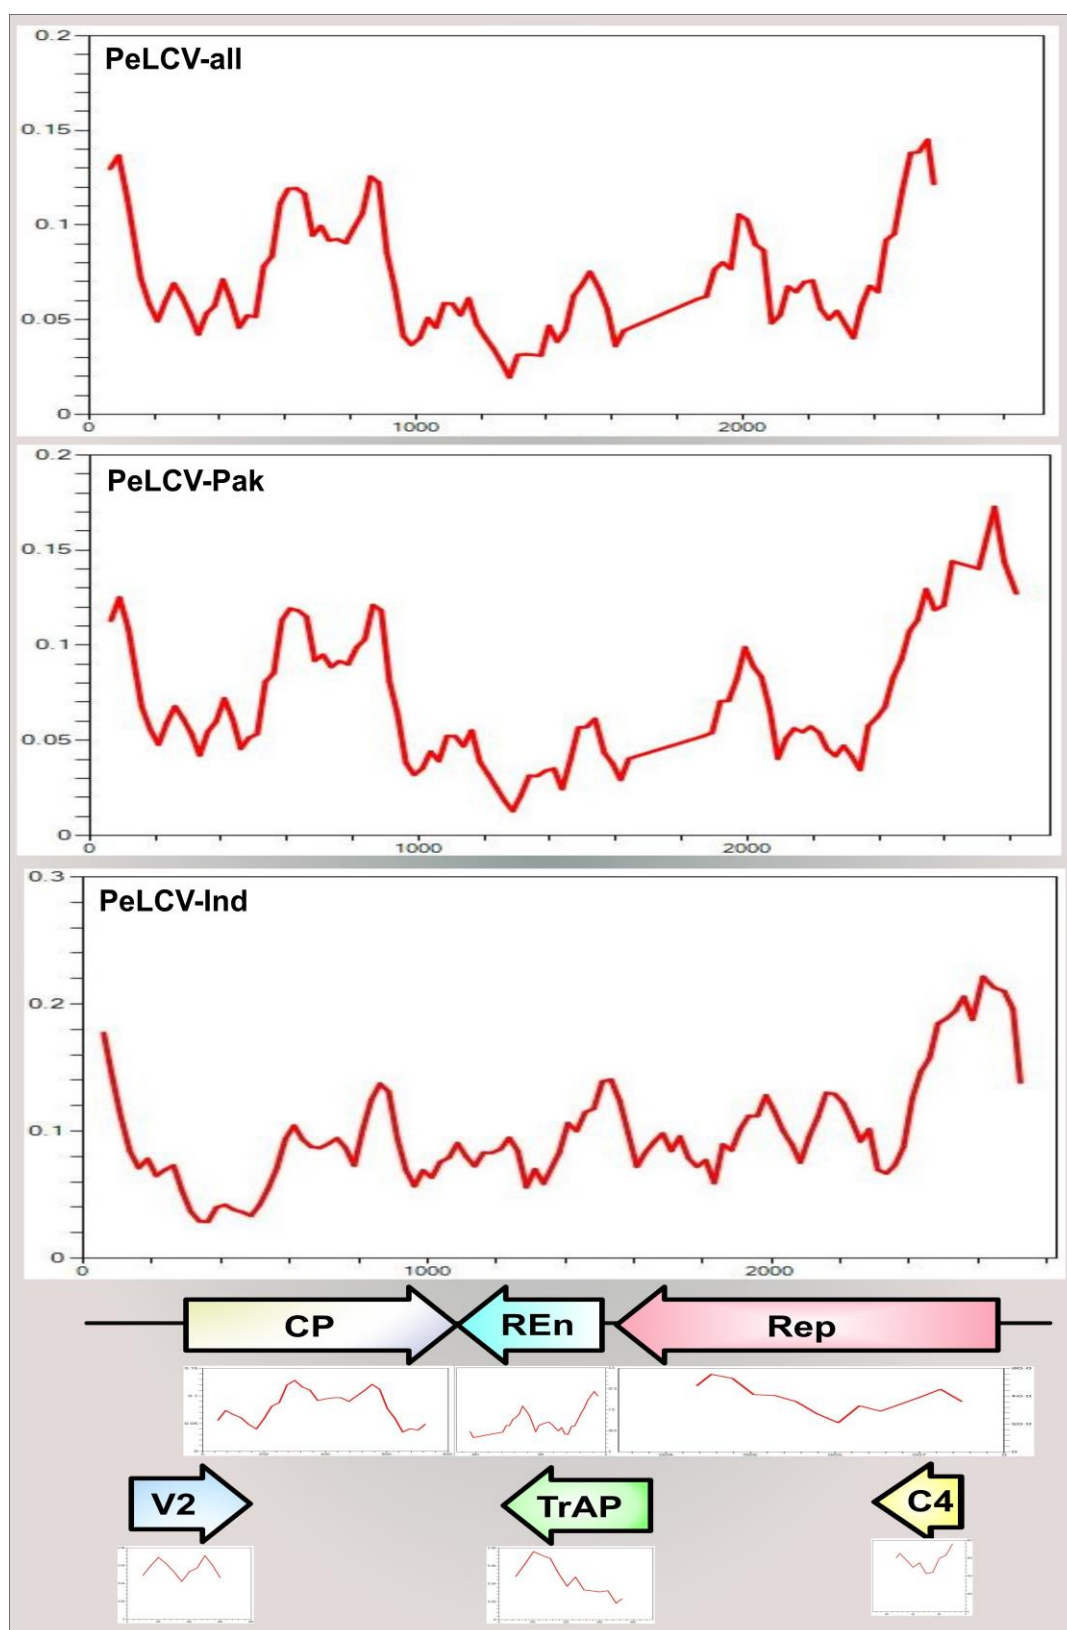

**Figure S2:** Total nucleotide diversity across all the nucleotide of all the PeLCV datasets. Along y-axis nucleotide diversity ( $\pi$ ) and along x-axis nucleotide position is mentioned. A linear genome organization is mentioned to map the  $\pi$  value at each ORF.

**Table S1.** Recombination events detected in the entire PeLCV-all population

| PeLCV accession #                  | Number of recombination events | Recombination breakpoint* | Major parent | Minor parent | RDP methods                 | Highest P values detected by the underline method <sup>‡</sup> |
|------------------------------------|--------------------------------|---------------------------|--------------|--------------|-----------------------------|----------------------------------------------------------------|
| AM712436                           | 2                              | 2738-16                   | JN807764     | NC008299     | R,G,B,M, <u>C</u> ,3S       | 80.4E-07                                                       |
|                                    |                                | 2576-2625                 | NV008299     | MN566097     | R, <u>G</u> ,M,C,3S         | 6.42E-04                                                       |
| AM948961                           | 1                              | 1967-2402                 | HF568781     | KY937947     | R, <u>M</u> ,C,3S           | 1.67E-04                                                       |
| DQ116884                           | 2                              | 1138-1661                 | Unknown      | MN885483     | R,B,M,C,S, <u>3S</u>        | 1.82E-05                                                       |
|                                    |                                | 1746-2559                 | Unknown      | AM848961     | R,G,B, <u>M</u> ,C,S,3S     | 6.50E-11                                                       |
| JN807764                           | 3                              | 730-1924                  | JQ012790     | MN910265     | B, <u>M</u> ,C,3S           | 1.71E-17                                                       |
|                                    |                                | 1956-2476                 | KY937947     | MN885482     | R,M,C, <u>3S</u>            | 2.93E-08                                                       |
|                                    |                                | 2600-2625                 | NC008299     | MN566097     | R, <u>G</u> ,M,C,3S         | 6.42E-04                                                       |
| JQ12790                            | 2                              | 1166-2404                 | KY937947     | MH550115     | R,G,B,M,S, <u>3S</u>        | 8.66E-13                                                       |
|                                    |                                | 2600-2625                 | NC008299     | MN566097     | R, <u>G</u> ,M,C,3S         | 6.42E-04                                                       |
| KX168427                           | 2                              | 2746-364                  | JN807764     | NC008299     | R,G,B,M, <u>C</u> ,3S       | 8.04E-07                                                       |
|                                    |                                | 2576-2625                 | NC008299     | MN566097     | R, <u>G</u> ,M,C,3S         | 6.42E-04                                                       |
| KX671561                           | 1                              | 1972-2747                 | MG764705     | MN566097     | G,B,M, <u>S</u> , <u>3S</u> | 2.37E-08                                                       |
| KX671562                           | 1                              | 1740-2658                 | MG764705     | MN566097     | G,B,M, <u>S</u> ,3S         | 2.37E-08                                                       |
| KX671563                           | 2                              | 1679-2437                 | LN713272     | Unknown      | R,G,M,C,S, <u>3S</u>        | 4.56E-18                                                       |
|                                    |                                | 1865-1963                 | KX671562     | Unknown      | G,M, <u>S</u> ,3S           | 6.01E-13                                                       |
| KX710160                           | 2                              | 834-1075                  | MN885483     | Unknown      | <u>R</u> ,G,B,M,C,S,3S      | 1.55E-09                                                       |
|                                    |                                | 2559-648                  | LN713272     | KX168427     | R,G, <u>M</u> ,C,3S         | 1.26E-09                                                       |
| KX711622                           | 1                              | 1731-2664                 | MG764705     | MN566097     | G,B,M, <u>S</u> ,3S         | 2.37E-09                                                       |
| KY937947                           | 2                              | 2576-2625                 | NC008299     | MN566097     | R, <u>G</u> ,M,C, <u>3S</u> | 6.42E-04                                                       |
|                                    |                                | 2738-438                  | JN807764     | NC008299     | R,G,B,M, <u>C</u> ,3S       | 8.04E-07                                                       |
| KY978406                           | 2                              | 2576-2625                 | NC008299     | MN566097     | R, <u>G</u> ,M,C, <u>3S</u> | 6.42E-04                                                       |
|                                    |                                | 2738-438                  | JN807764     | NC008299     | R,G,B,M, <u>C</u> ,3S       | 8.04E-07                                                       |
| LN678638;<br>LN713272;<br>LN713273 | 1                              | 1965-2427                 | HF568781     | KY937947     | R,M, <u>C</u> ,3S           | 1.07E-04                                                       |
| LT600729                           | 3                              | 45-1041                   | HF568781     | Unknown      | R,G,B,M,C, <u>3S</u>        | 1.58E-21                                                       |
|                                    |                                | 1964-2385                 | MG764705     | Unknown      | R,M,C, <u>S</u> ,3S         | 7.56E-15                                                       |
|                                    |                                | 2608-1272                 | HF568781     | Unknown      | G,B,M,C,S, <u>3S</u>        | 2.15E-60                                                       |
| LT795117                           | 2                              | 1956-2385                 | MG764705     | Unknown      | R,M,C, <u>S</u> ,3S         | 7.56E-15                                                       |
|                                    |                                | 2505-1280                 | HF568781     | Unknown      | G,B,M,C,S, <u>3S</u>        | 2.15E-60                                                       |
| LT795118                           | 3                              | 45-1148                   | HF568781     | Unknown      | R,G,B,M,C,S, <u>3S</u>      | 1.58E-21                                                       |
|                                    |                                | 1956-2385                 | MG764705     | Unknown      | R,M,C, <u>S</u> ,3S         | 7.56E-15                                                       |
|                                    |                                | 2505-1280                 | HF568780     | Unknown      | G,B,M,C,S, <u>3S</u>        | 2.15E-60                                                       |

|                                                 |   |           |          |          |                        |          |
|-------------------------------------------------|---|-----------|----------|----------|------------------------|----------|
| MF135486                                        | 1 | 52-1956   | MF135486 | AM948961 | G,M,C, <u>3S</u>       | 3.03E-09 |
| MF278788;                                       | 2 | 2576-2625 | NC008299 | MN566097 | R, <u>G</u> ,M,C,S,3S  | 6.42E-04 |
| MF278789                                        |   | 2738-438  | JN807764 | NV008299 | R,G,B,M, <u>C</u> ,3S  | 8.04E-07 |
| MG764701;<br>MG764702;<br>MG764703:M<br>G764705 | 1 | 1869-2289 | HF568781 | KY937947 | R, <u>M</u> ,C,3S      | 1.67E-04 |
| MH550115                                        | 4 | 638-1145  | Unknown  | LN678638 | R,G,M,C, <u>S</u>      | 6.63E-18 |
|                                                 |   | 1202-1598 | OM993557 | KX671562 | R,M,C, <u>S</u> ,3S    | 2.06E-12 |
|                                                 |   | 1519-2017 | HF568781 | KY937947 | <u>R</u> ,G,M,C,3S     | 3.39E-05 |
|                                                 |   | 2753-273  | MK158208 | KX671562 | <u>R</u> ,G,B,M,C,S,3S | 9.64E-12 |
| MH643736                                        | 2 | 1201-2398 | KY937947 | MH550115 | R,G,B,M,C, <u>3S</u>   | 8.66E-13 |
|                                                 |   | 2600-2625 | NC008299 | MN566097 | R, <u>G</u> ,M,C,3S    | 6.42E-07 |
| MH765695                                        | 3 | 116-570   | MF278789 | Unknown  | R,G,M,C,S, <u>3S</u>   | 1.30E-08 |
|                                                 |   | 2577-2625 | NC008299 | MN566097 | R, <u>G</u> ,M,C,3S    | 6.42E-04 |
|                                                 |   | 2741-600  | JN807764 | NC008299 | R,G,B,M, <u>C</u> ,3S  | 8.04E-07 |
| MH973686                                        | 2 | 1956-2385 | MG764705 | Unknown  | R,M,C, <u>S</u> ,3S    | 7.56E-15 |
|                                                 |   | 2505-1280 | HF568781 | Unknown  | G,B,M,C,S, <u>3S</u>   | 2.15E-60 |
| MH973687                                        | 3 | 1745-1984 | KX710160 | Unknown  | G,M,C, <u>S</u> ,3S    | 1.59E-09 |
|                                                 |   | 1985-2707 | Unknown  | MF135486 | R,M,C,S, <u>3S</u>     | 5.73E-10 |
|                                                 |   | 2724-1103 | HF568781 | Unknown  | R,G,B,M,C,S, <u>3S</u> | 1.58E-21 |
| MH973688                                        | 3 | 1743-1985 | KX710160 | Unknown  | G,M,C, <u>S</u> ,3S    | 1.59E-09 |
|                                                 |   | 1994-2678 | Unknown  | MF165486 | R,M,C,S, <u>3S</u>     | 5.73E-11 |
|                                                 |   | 2750-1168 | HF568781 | Unknown  | R,G,B,M,C,S, <u>3S</u> | 1.58E-21 |
| MK158207;<br>MK158208                           | 3 | 639-1140  | Unknown  | LN678638 | R,G,M,C,S, <u>3S</u>   | 6.63E-18 |
|                                                 |   | 1141-1659 | OM993557 | LN713272 | <u>R</u> ,G,B,M,C,S,3S | 1.01E-09 |
|                                                 |   | 1705-2416 | HF568781 | KY937947 | R,G,B,M,C,S,3S         | 1.01E-09 |
| MK158209                                        | 3 | 384-2147  | OM993555 | Unknown  | R,G,B,M,C,S, <u>3S</u> | 2.76E-16 |
|                                                 |   | 1484-1974 | OM993555 | Unknown  | R,G,M,C,S, <u>3S</u>   | 2.54E-11 |
|                                                 |   | 2393-2696 | MH550115 | MH973687 | G,B,M,C,S,3S           | 6.48E-28 |
| MN566097;<br>MN566098                           | 2 | 381-511   | LN313272 | KY937947 | <u>R</u> ,G,M,C,S,3S   | 8.61E-12 |
|                                                 |   | 1968-2389 | MN566097 | Unknown  | R,M,C, <u>S</u> ,3S    | 7.56E-15 |
| MN885484                                        | 2 | 415-1678  | KX671562 | MH973687 | R,G,B,M,C,S, <u>3S</u> | 4.31E-43 |
|                                                 |   | 415-1152  | LN713272 | OM993557 | M,C,S, <u>3S</u>       | 1.02E-14 |
| MN885485                                        | 2 | 423-1694  | KX671562 | MH973687 | R,G,B,M,C,S, <u>3S</u> | 4.31E-43 |
| MN910265                                        | 4 | 272-812   | MF278789 | Unknown  | R,G,B,M,C,S, <u>3S</u> | 7.93E-13 |
|                                                 |   | 2120-2443 | KY937947 | Unknown  | <u>R</u> ,G,B,M,C,S,3S | 4.63E-11 |
|                                                 |   | 2576-2625 | NC008299 | MN566097 | R, <u>G</u> ,M,C,3S    | 6.49E-04 |
|                                                 |   | 2738-271  | JN807764 | NC008299 | R,G,B,M, <u>C</u> ,3S  | 8.05E-07 |
| NC008299                                        | 2 | 1138-1661 | Unknown  | MN885483 | R,B,M,C, <u>S</u>      | 9.12E-08 |
|                                                 |   | 1662-2564 | Unknown  | AM948961 | R,G,B, <u>M</u> ,C,S   | 6.95E-11 |

|          |   |           |          |          |                        |          |
|----------|---|-----------|----------|----------|------------------------|----------|
| NC012118 | 1 | 2762-438  | JN807764 | NC008299 | R,G,B,M, <u>C</u> ,3S  | 8.04E-07 |
| OM144969 | 1 | 1277-2467 | HF568781 | Unknown  | G,B,M,C, <u>3S</u>     | 1.34E-45 |
| OM993555 | 3 | 926-1472  | OM993557 | MK158209 | R,G,B,M,C,S, <u>3S</u> | 1.04E-09 |
|          |   | 1512-2009 | HF568781 | KY937947 | <u>R</u> ,G,M,C,S,3S   | 3.39E-06 |
|          |   | 2328-254  | MK158208 | MF278789 | B,M,C,S, <u>3S</u>     | 2.38E-12 |
| OM993556 | 5 | 636-1143  | Unknown  | LN678638 | R,G,M,C, <u>S</u>      | 6.63E-18 |
|          |   | 1376-1598 | OM993557 | KX671562 | R,M,C, <u>S</u> ,3S    | 2.06E-12 |
|          |   | 1535-2405 | HF568781 | KY937947 | <u>R</u> ,G,M,C,S,3S   | 3.39E-06 |
|          |   | 2512-2784 | Unknown  | MK158208 | R,G,B,M,C,S, <u>3S</u> | 1.86E-25 |
|          |   | 2785-304  | MK158208 | KX671562 | <u>R</u> ,G,B,M,C,S,3S | 9.63E-12 |
| OM993557 | 3 | 636-1144  | Unknown  | LN678638 | R,G,M,C, <u>S</u>      | 6.63E-18 |
|          |   | 1376-1598 | OM993557 | KX671562 | R,M,C, <u>S</u> ,3S    | 3.39E-08 |
|          |   | 2754-272  | MK158208 | KX671562 | <u>R</u> ,G,B,M,C,S,3S | 9.63E-12 |
| ON054966 | 1 | 1497-2655 | KX671562 | Unknown  | B,M,C, <u>S</u>        | 6.06E-16 |

**Table S2.** Recombination events detected in PeLCV-Pak

| PeLCV accession # | Number of recombination events | Recombination breakpoint* | Major parent | Minor parent | RDP methods            | Highest P values detected by the underline method* |
|-------------------|--------------------------------|---------------------------|--------------|--------------|------------------------|----------------------------------------------------|
| AM948961          | 1                              | 1990-2574                 | MN566098     | Unknown      | R,G,M,C,S, <u>3S</u>   | 1.85E-11                                           |
| DQ116884          | 2                              | 978-2561                  | KY937947     | LN678638     | R, <u>M</u> ,C,S,3S    | 5.86E-08                                           |
|                   |                                | 2577-2622                 | KY937947     | Unknown      | R,G,M, <u>C</u>        | 1.31E-04                                           |
| HF568781          | 1                              | 1169-2751                 | OM993557     | LT600729     | R,G,B,M,S, <u>3S</u>   | 2.43E-36                                           |
| KX671561          | 1                              | 1169-2751                 | OM993557     | LT600729     | R,G,B,M,S, <u>3S</u>   | 2.43E-36                                           |
| KX671562          | 1                              | 1169-2751                 | OM993557     | LT600729     | R,G,B,M,S, <u>3S</u>   | 2.43E-36                                           |
| KX671563          | 2                              | 1171-1966                 | MN885484     | Unknown      | R,G,M,C, <u>3S</u>     | 7.01E-18                                           |
|                   |                                | 1194-1830                 | Unknown      | KX671562     | R,B,M, <u>3S</u>       | 2.13E-07                                           |
| KX710160          | 3                              | 834-1075                  | MN885483     | Unknown      | <u>R</u> ,G,B,M,C,S,3S | 8.79E-10                                           |
|                   |                                | 1921-2210                 | LT795118     | MF278789     | G,M, <u>C</u> ,S,3S    | 2.06E-04                                           |
|                   |                                | 2559-648                  | LN713272     | KY937947     | R,G, <u>M</u> ,C,S,3S  | 3.10E-09                                           |
| KX711622          | 1                              | 1162-2750                 | OM993557     | LT600729     | R,G,B,M,S, <u>3S</u>   | 2.43E-36                                           |
| LN678638          | 1                              | 1952-2400                 | LT795118     | KY937947     | R,M, <u>S</u> ,3S      | 1.27E-26                                           |
| LN713272          | 1                              | 1924-2572                 | MN885484     | Unknown      | R,B,M, <u>S</u>        | 1.01E-08                                           |
| LN713273          | 1                              | 1952-2400                 | LT795118     | KY937947     | R,M, <u>S</u> ,3S      | 1.27E-26                                           |
| LT600729          | 1                              | 2739-978                  | KX671563     | Unknown      | R,G,B,M, <u>S</u> ,3S  | 3.24E-14                                           |
| LT795117          | 1                              | 2729-1142                 | KX671563     | Unknown      | R,G,B,M, <u>S</u> ,3S  | 3.24E-14                                           |
| LT795118          | 1                              | 2729-1142                 | KX671563     | Unknown      | R,G,B,M, <u>S</u> ,3S  | 3.24E-14                                           |

|          |   |           |          |          |                              |           |
|----------|---|-----------|----------|----------|------------------------------|-----------|
| MF135486 | 1 | 1135-2729 | OM993557 | LT600729 | R,G,B,M,S, <u>3S</u>         | 2.43E-36  |
| MG764701 | 1 | 1924-2127 | KY671562 | KY937947 | R,B,M, <u>S</u> ,3S          | 1.19E-23  |
| MG764702 | 1 | 1924-2127 | KY671562 | KY937947 | R,B,M, <u>S</u> ,3S          | 1.19E-23  |
| MG764703 | 1 | 1924-2127 | KY671562 | KY937947 | R,B,M, <u>S</u> ,3S          | 1.19E-23  |
| MG764704 | 1 | 1298-2254 | KY671562 | KY937947 | R,B,M, <u>S</u> ,3S          | 1.19E-23  |
| MG764705 | 1 | 1924-2127 | KY671562 | KY937947 | R,B,M, <u>S</u> ,3S          | 1.19E-23  |
| MH550515 | 2 | 2515-272  | MK158208 | MN885482 | G,B,M,S, <u>3S</u>           | 2.37E-09  |
|          |   | 2514-2777 | OM993556 | MK158208 | R,G,B,M,S, <u>3S</u>         | 3.52E-23  |
| MH643736 | 2 | 1140-2480 | MF278789 | Unknown  | R,M,S, <u>3S</u>             | 1.44E-12  |
|          |   | 2745-352  | MF278789 | Unknown  | R,M,S, <u>3S</u>             | 4.51E-15  |
| MH973686 | 1 | 2-1037    | KX671563 | Unknown  | R,G,B,M,S, <u>3S</u>         | 2.98E-14  |
| MH973687 | 2 | 1661-1985 | LT600729 | Unknown  | R,G,M,S, <u>3S</u>           | 1.41E-09  |
|          |   | 2739-1139 | KX671563 | OM993556 | R,G,B,M,S, <u>3S</u>         | 7.98E-29  |
| MH973688 | 2 | 4-1161    | KX671563 | OM993556 | R,G,B,M,S, <u>3S</u>         | 7.98E-29  |
|          |   | 1746-1987 | LT600729 | Unknown  | R,G,M,S, <u>3S</u>           | 1.41E-09  |
| MK158207 | 2 | 1594-1946 | MN885482 | KY937947 | R,G,B,M,C, <u>S</u> ,3S      | 2.21E-08  |
|          |   | 25-267    | MF135486 | Unknown  | M,C, <u>S</u> ,3S            | 7.33E-04  |
| MK158208 | 1 | 1496-2401 | MN885482 | KY937947 | R,G,B,M,C, <u>S</u> ,3S      | 2.21E-08  |
| MK158209 | 3 | 384-2147  | OM993555 | Unknown  | R,G,B,M,C,S, <u>3S</u>       | 21.57E-16 |
|          |   | 1484-1974 | OM993555 | Unknown  | R,G,M,C,S, <u>3S</u>         | 1.44E-11  |
|          |   | 2393-2696 | MH550115 | MH973686 | G,M,C,S, <u>3S</u>           | 7.46E-27  |
| MN566097 | 2 | 381-511   | LN713272 | KY937947 | <u>R</u> ,G,C,M,S, <u>3S</u> | 2.57E-09  |
|          |   | 1164-2753 | OM993557 | LT600729 | R,G,M,S, <u>3S</u>           | 2.43E-36  |
| MN566098 | 3 | 381-511   | LN713272 | KY937947 | <u>R</u> ,G,C,M,S, <u>3S</u> | 2.57E-09  |
|          |   | 1164-2753 | OM993557 | LT600729 | R,G,M,S, <u>3S</u>           | 2.43E-36  |
|          |   | 1425-2525 | Unknown  | MN885484 | B,M,S, <u>3S</u>             | 4.46E-07  |
| MN885482 | 1 | 1952-2357 | LT795118 | KY937947 | R,B,M, <u>S</u> ,3S          | 2.04E-29  |
| MN885483 | 1 | 1914-2527 | MN885484 | Unknown  | R,G,B,M,S, <u>3S</u>         | 9.86E-10  |
| MN885484 | 2 | 37-381    | LT600729 | MF135486 | R,G,B,C,M,S, <u>3S</u>       | 1.53E-25  |
|          |   | 2725-1101 | KX671563 | Unknown  | R,G,B,C,M, <u>S</u> ,3S      | 3.24E-14  |
| MN885485 | 1 | 59-1101   | KX671563 | Unknown  | R,G,B,C,M,S, <u>3S</u>       | 3.24E-14  |
| MN910265 | 2 | 302-812   | KY937947 | Unknown  | R,G,C,M,S, <u>3S</u>         | 1.35E-12  |
|          |   | 2120-2443 | KY937947 | LN678638 | R, <u>C</u> ,M,S,3S          | 2.16E-07  |
| OM993555 | 3 | 1486-1972 | MN885482 | KY937947 | R,G,B,C,M, <u>S</u>          | 2.21E-06  |
|          |   | 2349-2724 | MH550115 | MH973687 | G,C,M,S, <u>3S</u>           | 7.46E-28  |
|          |   | 2349-253  | MK158208 | MF278789 | R,G,B,C,M, <u>S</u> ,3S      | 1.12E-16  |
| OM993556 | 3 | 615-1518  | Unknown  | LN713272 | B,C,M, <u>S</u>              | 2.70E-14  |
|          |   | 1535-2407 | MN885482 | KY937947 | R,G,B,C,M, <u>S</u> ,3S      | 2.21E-08  |
|          |   | 2731-271  | MK158208 | MN885482 | G,B,C,M,S, <u>3S</u>         | 2.36E-09  |
| OM993557 | 2 | 2513-2765 | OM993556 | MK158208 | R,G,B,C,M,S, <u>3S</u>       | 3.52E-23  |
|          |   | 2513-348  | MK158208 | MN885482 | G,B,C,M,S, <u>3S</u>         | 2.36E-09  |

|          |   |           |          |          |                     |          |
|----------|---|-----------|----------|----------|---------------------|----------|
| NC008299 | 2 | 1076-2576 | KY937947 | LN678638 | R, <u>M</u> ,C,S,3S | 5.86E-08 |
|          |   | 2577-2642 | KY937947 | Unknown  | R,G,M, <u>C</u>     | 1.74E-08 |

**Table S3.** Recombination events detected in PeLCV-Ind

| PeLCV accession # | Number of recombination events | Recombination breakpoint* | Major parent | Minor parent | RDP methods             | Highest P values detected by the underline method <sup>‡</sup> |
|-------------------|--------------------------------|---------------------------|--------------|--------------|-------------------------|----------------------------------------------------------------|
| JN807764          | 3                              | 93-573                    | MH765695     | OK236813     | R,G,B,M, <u>C</u> ,S,3S | 1.08E-08                                                       |
|                   |                                | 1074-1654                 | JQ012792     | Unknown      | R,G,B,M,C,S, <u>3S</u>  | 7.55E-13                                                       |
|                   |                                | 1734-2518                 | KX168427     | OK236813     | R,B,M,C, <u>S</u> ,3S   | 1.91E-15                                                       |
| JQ12790           | 3                              | 93-573                    | MH765695     | OK236813     | R,G,B,M,S, <u>3S</u>    | 2.26E-10                                                       |
|                   |                                | 1076-1865                 | KX168427     | OK236813     | R,G,B,M,C,S, <u>3S</u>  | 9.01E-08                                                       |
|                   |                                | 1962-2563                 | KX168427     | OK236813     | R,B,M,C, <u>S</u> ,3S   | 2.48E-15                                                       |
| MH765695          | 1                              | 1076-2548                 | JQ012790     | Unknown      | R,B,M,C, <u>S</u> ,3S   | 9.92E-25                                                       |
| OM144969          | 2                              | 1261-2425                 | OK236813     | Unknown      | R,G,B,M,C,S, <u>3S</u>  | 4.44E-14                                                       |
|                   |                                | 2740-74                   | OK236813     | KX168427     | R,G,B, <u>M</u> ,C,S,3S | 1.96E-07                                                       |
| KX168427          | 3                              | 80-596                    | MH765695     | OK236813     | R,G,B,M,C,S, <u>3S</u>  | 2.26E-10                                                       |
|                   |                                | 1130-1324                 | MH765695     | OK236813     | G,M,C, <u>S</u> ,3S     | 3.87E-10                                                       |
|                   |                                | 1562-1879                 | MH765695     | OM144969     | R,M,C, <u>S</u>         | 5.97E-16                                                       |
